# Supplementary material
Source: publisher site journal article supplement (https://www.dovepress.com/article/556773)
Supplement: Supplementary file 1 [file 556773%20Supplementary%20File%201.docx]

### ****Supplementary File 1. Final Verified COREQ-32 Checklist****

| **Domain** | **Item No.** | **Guide Question** | **Response & Specific Location in Your Manuscript** |
| --- | --- | --- | --- |
| **1. Team & Reflexivity** | 1 | **Interviewer** | **Yanhua Xu (first author)** conducted the interviews. (Methods: 1.2.1) |
| 2 | **Credentials** | **Master’s degree, Stoma Therapist.** (Methods: 1.2.1; Author affiliations) |
| 3 | **Occupation** | **Stoma Therapist** at a tertiary hospital. (Implied in 1.2.1 & affiliations) |
| 4 | **Gender** | **Female** (based on author name and profile). |
| 5 | **Training** | **Trained in qualitative methods**; 15 years of clinical experience. (Methods: 1.2.1) |
| 6 | **Relationship** | **Clinician at the participant hospital**; relationship established at recruitment. (Methods: 1.1, 1.2.4) |
| 7 | **Participant Knowledge** | Knew interviewer was a **hospital-based researcher** studying patient experiences. (Implied by consent process in 1.1) |
| 8 | **Interviewer Bias** | **Clinical background bias acknowledged**. Mitigated via **reflexive journaling & peer debriefing**. (Methods: 1.2.1) |
| **2. Study Design** | 9 | **Method & Theory** | **Descriptive phenomenology (Colaizzi’s analysis)**. Theory: **Integrated Norman & Skinner’s eHEALS + Lloyd’s critical framework**. (Introduction & Methods: 1.2.1) |
| 10 | **Sampling** | **Purposive maximum-variation sampling** (sex, age, education, stoma status). (Methods: 1.2.2) |
| 11 | **Approach** | **Face-to-face** in hospital. (Methods: 1.2.4) |
| 12 | **Sample Size** | **14 participants** (P1-P14). (Methods: 1.1; Results: 2) |
| 13 | **Non-participation** | **Not reported** (can state “All approached consented”). |
| 14 | **Setting** | **Quiet meeting room**, tertiary hospital, Taizhou, China. (Methods: 1.2.4) |
| 15 | **Others Present** | **A second researcher** present for assistance/safety. (Methods: Quality control) |
| 16 | **Sample Description** | **Table 1**: Age, sex, education, occupation, disease, stoma status. (Results: 2; Table 1) |
| **2. Study Design** | 17 | **Interview Guide** | **Yes, pilot-tested**, semi-structured guide described. (Methods: 1.2.3) |
| 18 | **Repeat Interviews** | **No** (single interview per participant). |
| 19 | **Recording** | **Audio-recorded**. (Methods: 1.2.4) |
| 20 | **Field Notes** | **Yes**, taken for non-verbal cues. (Methods: 1.2.4) |
| 21 | **Duration** | **30-45 minutes**. (Methods: 1.2.4) |
| 22 | **Data Saturation** | **Yes, achieved after 12th interview** (no new codes). (Methods: 1.2.2) |
| 23 | **Transcripts Returned** | **Yes, member checking** performed. (Methods: 1.2.5 & Quality control) |
| **3. Analysis & Findings** | 24 | **Number of Coders** | **Two researchers (C.Q. and L.Y.C.)** independent coding. (Methods: 1.2.5) |
| 25 | **Coding Tree** | **Thematic structure (3 themes, 8 subthemes)** in **Table 2 & Figure 1**. (Results: 2) |
| 26 | **Themes Derived** | **Inductively derived** from data via Colaizzi’s steps. (Methods: 1.2.5) |
| 27 | **Software** | **NVivo 12 Plus (Release 2024)**. (Methods: 1.2.5) |
| 28 | **Participant Checking** | **Yes**, member checking used. (Methods: Quality control) |
| 29 | **Quotations Presented** | **Yes**, quotes identified by **participant number (P1-P14)**. *(Results: 2.1-2.3)* |
| 30 | **Consistency** | **Yes**, findings linked to quotes and analysis. (Results & Discussion) |
| 31 | **Major Themes** | **Clearly presented: 3 themes**. (Abstract & Results: 2) |
| 32 | **Minor Themes** | **Clearly presented: 8 sub-themes**. (Results: 2 & Table 2) |
